# Supplementary material for: Environmental influence on Pristionchus pacificus mouth form through different culture methods
Source: PubMed Central journal article supplement (PMC5543044; doi:10.1038/s41598-017-07455-7), 2017-08-03
Supplement: 41598_2017_7455_MOESM1_ESM.pdf [file 41598_2017_7455_MOESM1_ESM.pdf]

## ***Supplementary Information***

### **Environmental influence on *Pristionchus pacificus* mouth form through different culture methods**

Michael S. Werner, Bogdan Sieriebriennikov, Tobias Loschko, Suryesh Namdeo,  
Masa Lenuzzi, Mohannad Dardiry, Tess Renahan, Devansh Raj Sharma and  
Ralf J. Sommer\*

<sup>1</sup>Department of Evolutionary Biology, Max Planck Institute for Developmental  
Biology, 72076 Tübingen, Germany

\*Correspondence: [ralf.sommer@tuebingen.mpg.de](mailto:ralf.sommer@tuebingen.mpg.de)

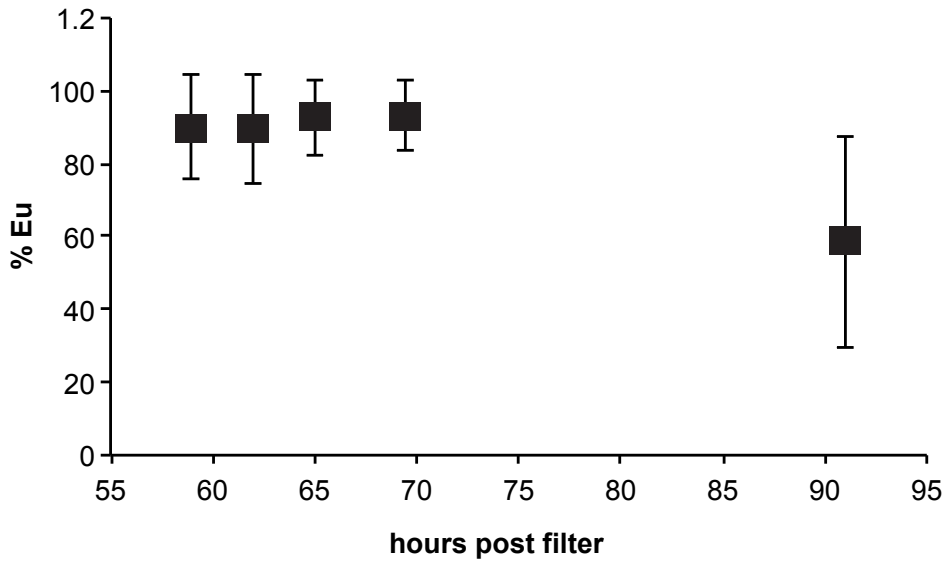

**Supplementary Figure 1. Growth rate of morphs in liquid culture.** Percent Eu of adult hermaphrodites grown in liquid at the J4-adult transition (59-70 hours post filter), and at 91 hours, a time point at which we normally collect and phenotype animals (n = 2). Worms were incubated at 22° C in S-Medium with 50 rpm shaking to induce sufficient numbers of both, St and Eu animals, allowing statistical significance testing ( $p > 0.05$  between any two time-points arguing against slower development of Eu animals, two-tailed t-test).

**A**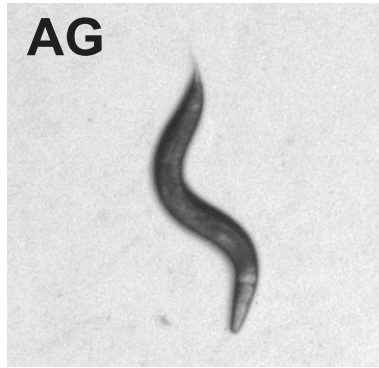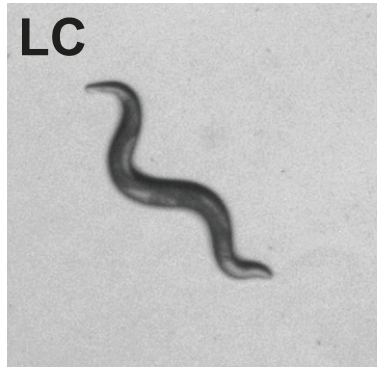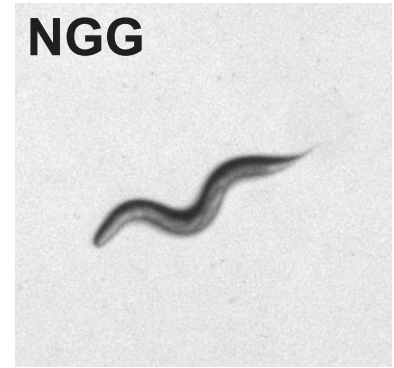**B**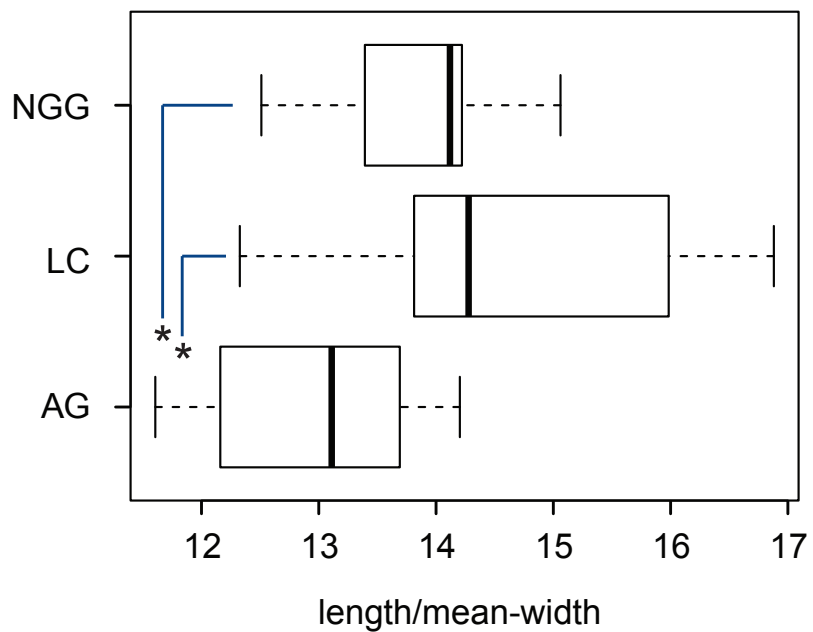**C**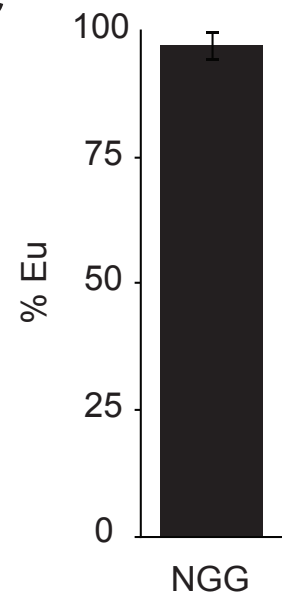

**Supplementary Figure 2. Slender morphology does not correlate with mouth-form.** (A) Images of *P. pacificus* grown in liquid culture and NGG display more slender morphology than on agar plates, quantified in (B). Measurements of adults from the same synchronized population were made with WormSizer<sup>68</sup>, n = 12 (agar), 13 (NGG), and 10 (liquid culture = 'LC'). Statistical significance was measured with a nonparametric Mann-Whitney U test in R. (C) Same as in Figure 2, mouth-form ratio of adult PS312 grown in NGG, n = 3.
